# Supplementary material for: The Risk Factors of Chronic Pain in Victims of Violence: A Scoping Review
Source: MDPI journal article supplement (doi:10.3390/healthcare11172421), 2023-08-29
Supplement: s1 [file s1]

## Summary of quality assessment

### *Cohort studies*

| Study     | Similarity of the two groups | Similarity of the exposure measure | Validity and reliability of exposure measure | Identified confounding factors | Strategies to deal with confounding factors | Freedom from the outcome at the start of the study | Validity and reliability of outcome measure | Follow up time | Completion of follow-up | Strategies to address incomplete follow-up | Appropriateness of statistical analysis |
|-----------|------------------------------|------------------------------------|----------------------------------------------|--------------------------------|---------------------------------------------|----------------------------------------------------|---------------------------------------------|----------------|-------------------------|--------------------------------------------|-----------------------------------------|
| Y-kzv2011 | +                            | +                                  | +                                            | +                              | ?                                           | -                                                  | +                                           | -              | +                       | -                                          | +                                       |
| F-owy2022 | +                            | +                                  | +                                            | +                              | +                                           | -                                                  | +                                           | ?              | ?                       | ?                                          | +                                       |

### *Case-control studies*

| Study      | Comparability of disease or in the absence of this | Appropriate match of cases and controls | Used of same criteria for identification of cases and controls | Validity and reliability of exposure measure | Similarity of the exposure measure | Identified confounding factors | Strategies to deal with confounding factors | Validity and reliability of outcome measure | Exposure period time | Appropriateness of statistical analysis |
|------------|----------------------------------------------------|-----------------------------------------|----------------------------------------------------------------|----------------------------------------------|------------------------------------|--------------------------------|---------------------------------------------|---------------------------------------------|----------------------|-----------------------------------------|
| G-lso2018  | +                                                  | +                                       | +                                                              | ?                                            | +                                  | +                              | +                                           | ?                                           | ?                    | +                                       |
| G-qtr-2019 | +                                                  | +                                       | +                                                              | +                                            | +                                  | ?                              | ?                                           | +                                           | +                    | +                                       |
| E-mbz2011  | +                                                  | +                                       | +                                                              | +                                            | +                                  | ?                              | ?                                           | -                                           | +                    | +                                       |
| W-hjp2010  | +                                                  | +                                       | +                                                              | +                                            | +                                  | ?                              | ?                                           | +                                           | +                    | +                                       |

## *Cross-sectional studies*

| <b>Study</b> | <b>Clear definition of inclusion criteria</b> | <b>Detailed description of the sample and the setting</b> | <b>Validity and reliability of exposure measure</b> | <b>Objectiveness of condition measurement</b> | <b>Identified confounding factors</b> | <b>Strategies to deal with confounding factors</b> | <b>Validity and reliability of outcome measure</b> | <b>Appropriateness of statistical analysis</b> |
|--------------|-----------------------------------------------|-----------------------------------------------------------|-----------------------------------------------------|-----------------------------------------------|---------------------------------------|----------------------------------------------------|----------------------------------------------------|------------------------------------------------|
| P-tdz2004    | ?                                             | -                                                         | ?                                                   | +                                             | +                                     | +                                                  | +                                                  | +                                              |
| H-lnb2008    | +                                             | +                                                         | +                                                   | ?                                             | -                                     | -                                                  | +                                                  | +                                              |
| K-xim2011    | +                                             | +                                                         | +                                                   | ?                                             | -                                     | -                                                  | +                                                  | +                                              |
| B-ang2007    | +                                             | +                                                         | +                                                   | +                                             | ?                                     | ?                                                  | +                                                  | +                                              |
| V-cse2010    | +                                             | +                                                         | +                                                   | +                                             | ?                                     | ?                                                  | +                                                  | +                                              |
| G-jfo2012    | +                                             | -                                                         | ?                                                   | +                                             | +                                     | +                                                  | +                                                  | +                                              |
| S-tre2013    | +                                             | +                                                         | +                                                   | +                                             | -                                     | -                                                  | +                                                  | +                                              |
| G-yqw2016    | +                                             | -                                                         | +                                                   | +                                             | +                                     | +                                                  | +                                                  | ?                                              |
| C-dte2010    | +                                             | +                                                         | +                                                   | +                                             | +                                     | ?                                                  | +                                                  | +                                              |
| E-msn2018    | +                                             | +                                                         | +                                                   | +                                             | +                                     | -                                                  | +                                                  | +                                              |
| S-hig2013    | +                                             | ?                                                         | +                                                   | +                                             | -                                     | -                                                  | +                                                  | +                                              |
| H-uve2017    | ?                                             | ?                                                         | +                                                   | +                                             | +                                     | +                                                  | +                                                  | ?                                              |
| G-sk2018     | +                                             | +                                                         | +                                                   | ?                                             | -                                     | -                                                  | +                                                  | +                                              |
| L-qua2017    | +                                             | +                                                         | +                                                   | +                                             | ?                                     | ?                                                  | +                                                  | +                                              |
| J-scu2020    | +                                             | ?                                                         | +                                                   | +                                             | +                                     | -                                                  | +                                                  | +                                              |
| A-mia2021    | ?                                             | +                                                         | +                                                   | ?                                             | +                                     | +                                                  | +                                                  | +                                              |
| A-scia2021   | +                                             | ?                                                         | +                                                   | ?                                             | +                                     | +                                                  | +                                                  | +                                              |
| R-phl2021    | +                                             | +                                                         | +                                                   | ?                                             | +                                     | -                                                  | +                                                  | +                                              |
| D-wgn2021    | +                                             | +                                                         | +                                                   | +                                             | +                                     | ?                                                  | +                                                  | +                                              |
